# Supplementary material for: Image Quality and Lesion Detectability of Lower-Dose Abdominopelvic CT Obtained Using Deep Learning Image Reconstruction
Source: PubMed Central journal article supplement — Korean J Radiol. 2022 Jan 27;23(4):402–12. doi: 10.3348/kjr.2021.0683 (PMC8961013; doi:10.3348/kjr.2021.0683), 2022-01-27
Supplement: kjr-23-402-s001.pdf [file kjr-23-402-s001.pdf]

## SUPPLEMENT

### **Details on Determining Reference Standard in the Lesion Detectability Analysis**

Since the pathological results for most liver lesions were not obtainable, two additional imaging studies composed of routine-dose CT or MRI – one within 1 year prior to SDCT and the other within 1 year after LDCT, were used to define the reference standard in each case. The time between these additional imaging studies was  $488 \pm 179$  days (range, 175–1088 days). Lesions with changes in size depending on the imaging studies were excluded because differences in size between SDCT and LDCT images could disturb lesion detectability. Lesions smaller than 3 mm in diameter were also excluded from the analysis because their detectability may suffer from partial volume averaging. Finally, 99 lesions in 34 patients were confirmed as true positives.

**Supplementary Table 1. Prespecified Equivalence Margins Used in the Equivalence Test for Quantitative Measures**

|                 | Liver | Muscle | Aorta |
|-----------------|-------|--------|-------|
| Image noise, HU | 2.017 | 2.257  | 2.782 |
| SNR             | 2.118 | 1.160  | 3.205 |
| CNR             | 4.693 | 3.409  | 6.790 |

CNR = contrast-to-noise ratio, HU = Hounsfield unit, SNR = signal-to-noise ratio

**Supplementary Table 2. Patient Characteristics of the Cohort Assessed for Lesion Conspicuity in Qualitative Image Quality Analysis**

|                                      | Standard Dose          | Lower Dose             | <i>P</i> |
|--------------------------------------|------------------------|------------------------|----------|
| Total number                         | 45                     |                        | N/A      |
| Age, years* <sup>†</sup>             | 64 ± 9 (46–86)         |                        | N/A      |
| Sex, male:female                     | 25:20                  |                        | N/A      |
| Study interval, days*                | 223 ± 87 (56–365)      |                        | N/A      |
| Body weight, kg*                     | 63 ± 11 (44–87)        | 63 ± 12 (37–90)        | 0.687    |
| Effective diameter, cm* <sup>‡</sup> | 25.1 ± 2.6 (20.2–32.0) | 25.3 ± 2.8 (19.2–32.8) | 0.079    |
| Scan length, cm*                     | 58.5 ± 3.9 (51.7–68.2) | 58.8 ± 3.9 (50.6–69.3) | 0.280    |
| Underlying oncologic disease         |                        |                        |          |
| Colorectal adenocarcinoma            | 43                     |                        | N/A      |
| Rectal NET or GIST                   | 1                      |                        | N/A      |
| Colon polyps                         | 1                      |                        | N/A      |

Unless otherwise specified, the data are the number of patients. \*Values represent mean ± standard deviation (range), <sup>†</sup>Age was recorded at the time of the lower-dose study, <sup>‡</sup>Effective diameter = geometric mean of AP and LAT, where AP is the anteroposterior dimension and LAT is the lateral dimension of the body cross-section. GIST = gastrointestinal stromal tumor, NET = neuroendocrine tumor, N/A = non-applicable

**Supplementary Table 3. Patient Characteristics of the Cohort for Lesion Detectability Analysis**

|                                      | Standard Dose          | Lower Dose             | P     |
|--------------------------------------|------------------------|------------------------|-------|
| Total number                         |                        | 84                     | N/A   |
| Age, years* <sup>†</sup>             | 63 ± 12 (28–85)        |                        | N/A   |
| Sex, male:female                     | 49:35                  |                        | N/A   |
| Study interval, days*                | 218 ± 90 (45–365)      |                        | N/A   |
| Body weight, kg*                     | 63 ± 10 (44–89)        | 63 ± 11 (37–93)        | 0.706 |
| Effective diameter, cm* <sup>‡</sup> | 25.5 ± 2.6 (20.2–33.0) | 25.5 ± 2.7 (19.2–33.4) | 0.935 |
| Scan length, cm*                     | 58.6 ± 3.6 (51.7–68.2) | 58.8 ± 3.5 (50.6–67.1) | 0.525 |
| Underlying oncologic disease         |                        |                        |       |
| Colorectal adenocarcinoma            | 79                     |                        | N/A   |
| Rectal NET or GIST                   | 3                      |                        | N/A   |
| Small bowel NET                      | 1                      |                        | N/A   |
| Cutaneous malignant melanoma         | 1                      |                        | N/A   |
| Focal liver lesions per patient      |                        |                        |       |
| n = 1                                | 11                     |                        | N/A   |
| n = 2                                | 6                      |                        | N/A   |
| n = 3                                | 5                      |                        | N/A   |
| n = 4                                | 4                      |                        | N/A   |
| n = 5                                | 5                      |                        | N/A   |
| n = 6                                | 2                      |                        | N/A   |
| n = 8                                | 1                      |                        | N/A   |

Unless otherwise specified, the data are the number of patients. \*Values are the mean ± standard deviation (range), <sup>†</sup>Age was recorded at the time of the lower-dose study, <sup>‡</sup>Effective diameter = geometric mean of AP and LAT, where AP is the anteroposterior dimension and LAT is the lateral dimension of the body cross-section. GIST = gastrointestinal stromal tumor, NET = neuroendocrine tumor, N/A = non-applicable

**Supplementary Table 4. Radiation Exposure of the Cohort Assessed for Lesion Conspicuity in Qualitative Image Quality Analysis**

|              | Standard Dose                  | Lower Dose                    | Dose Reduction               |                            | <i>P</i> |
|--------------|--------------------------------|-------------------------------|------------------------------|----------------------------|----------|
|              |                                |                               | Absolute                     | Relative, %                |          |
| SSDE, mGy    | 10.1 ± 1.6<br>(6.7–12.9)       | 6.6 ± 1.1<br>(4.8–10.2)       | 3.5 ± 0.9<br>(1.9–5.1)       | 34.4 ± 5.4<br>(16.3–45.2)  | < 0.001  |
| DLP, mGy·cm  | 413.1 ± 118.6<br>(202.8–697.1) | 273.3 ± 86.7<br>(140.5–568.1) | 139.4 ± 48.0<br>(43.6–235.7) | 33.7 ± 7.0<br>(15.3–51.6)  | < 0.001  |
| CTDIvol, mGy | 6.9 ± 1.7<br>(3.9–10.5)        | 4.6 ± 1.2<br>(2.7–9.1)        | 2.4 ± 0.7<br>(1.1–3.7)       | 33.8 ± 6.3<br>(13.3–48.14) | < 0.001  |

Data are presented as the mean ± standard deviation (range). CTDIvol = CT dose index volume, DLP = dose-length product, SSDE = size-specific dose estimate

**Supplementary Table 5. Radiation Exposure of the Cohort for Lesion Detectability Analysis**

|              | Standard Dose                  | Lower Dose                    | Dose Reduction               |                           | <i>P</i> |
|--------------|--------------------------------|-------------------------------|------------------------------|---------------------------|----------|
|              |                                |                               | Absolute                     | Relative, %               |          |
| SSDE, mGy    | 10.3 ± 1.7<br>(6.7–16.4)       | 6.6 ± 1.1<br>(4.8–10.8)       | 3.6 ± 0.9<br>(1.7–5.5)       | 34.9 ± 5.6<br>(16.3–47.6) | < 0.001  |
| DLP, mGy·cm  | 425.5 ± 125.0<br>(202.8–917.9) | 276.8 ± 86.9<br>(140.5–667.5) | 148.9 ± 56.3<br>(40.8–296.6) | 34.6 ± 7.8<br>(14.9–51.6) | < 0.001  |
| CTDIvol, mGy | 7.2 ± 1.8<br>(3.9–14.9)        | 4.7 ± 1.3<br>(2.7–9.9)        | 2.5 ± 0.9<br>(1.0–4.9)       | 34.8 ± 6.6<br>(13.3–50.1) | < 0.001  |

Data are presented as the mean ± standard deviation (range). CTDIvol = CT dose index volume, DLP = dose-length product, SSDE = size-specific dose estimate
